# Supplementary material
Source: Springer Nature journal article supplement (https://www.springermedizin.de/resource/supplementary/12908_2010_103_MOESM1_ESM.pdf/9525166)

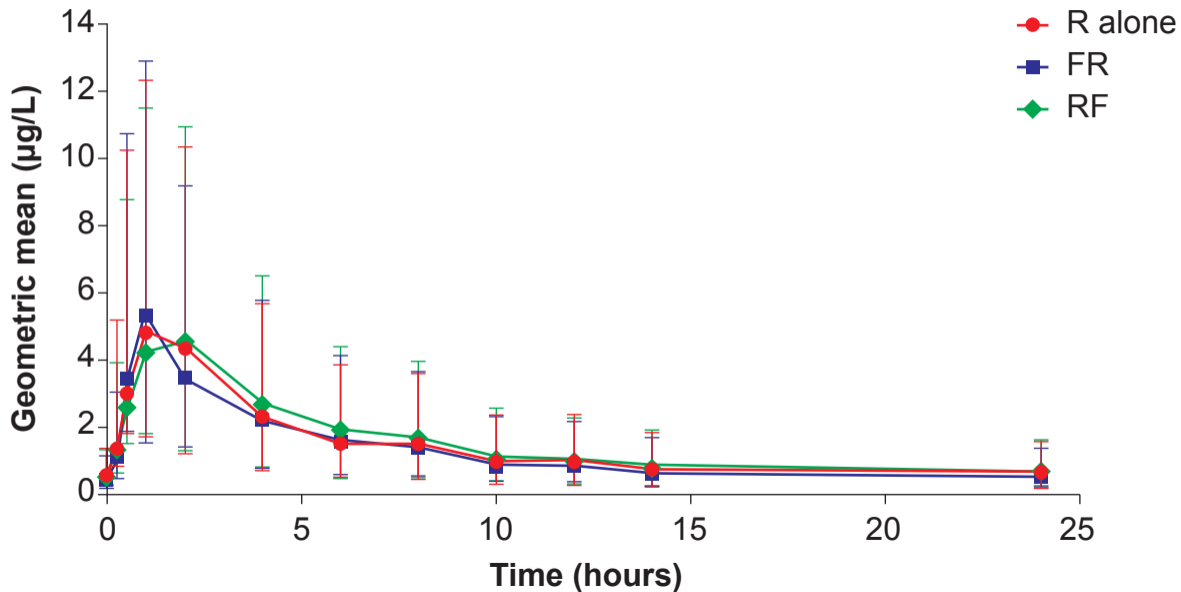

Supplement: MOESM1 [file 9525166]
